# Supplementary material for: Modes of mechanical ventilation vary between hospitals and intensive care units within a university healthcare system: a retrospective observational study
Source: PubMed Central journal article supplement (PMC6029057; doi:10.1186/s13104-018-3534-z), 2018-07-03
Supplement: 13104_2018_3534_MOESM2_ESM.pdf [file 13104_2018_3534_MOESM2_ESM.pdf]

Mechanical ventilation mode epochs identified from structured query (N = 559,762)

```
graph TD; A[Mechanical ventilation mode epochs identified from structured query (N = 559,762)] --> B[Mechanical ventilation mode epochs included in analysis set (N = 559,734)]; A --> C[Epochs excluded  
• Nonsensical (N = 28)];
```

Epochs excluded

- Nonsensical (N = 28)

Mechanical ventilation mode epochs included in analysis set (N = 559,734)
