# Supplementary material for: Modes of mechanical ventilation vary between hospitals and intensive care units within a university healthcare system: a retrospective observational study
Source: PubMed Central journal article supplement (PMC6029057; doi:10.1186/s13104-018-3534-z), 2018-07-03

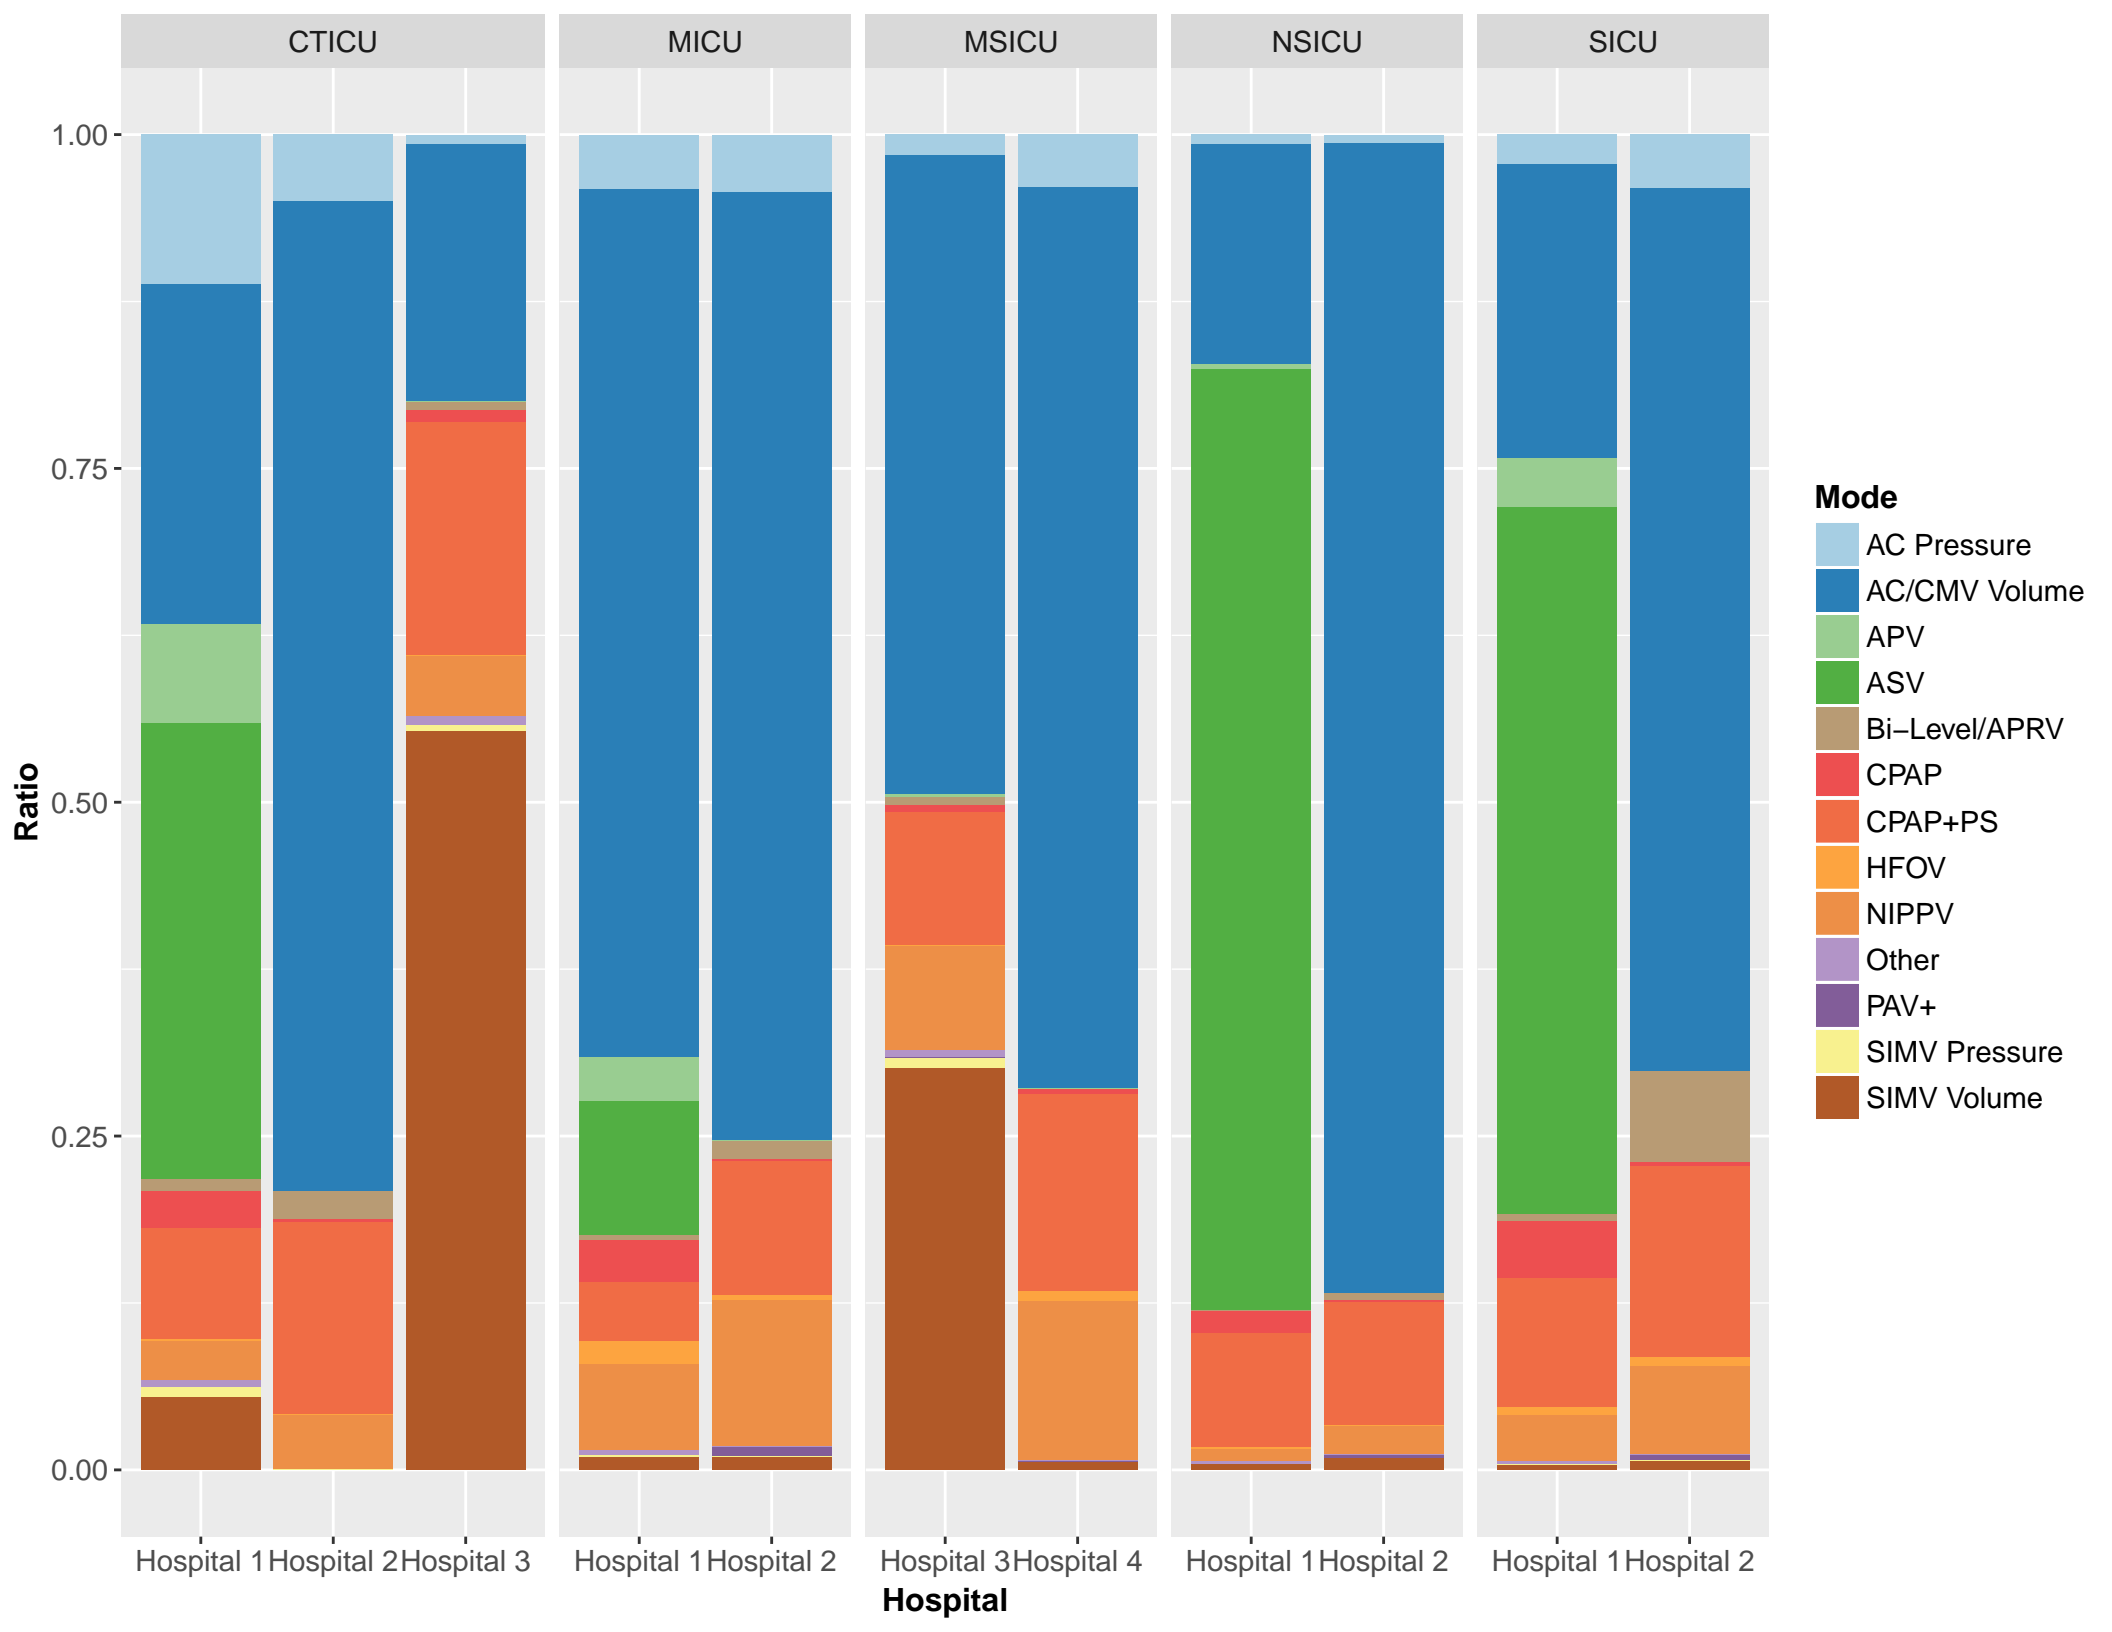

Supplement: 13104_2018_3534_MOESM4_ESM.pdf [file 13104_2018_3534_MOESM4_ESM.pdf]
